# Supplementary material
Source: PubMed Central journal article supplement (PMC424375)
Supplement: 7600211s1.pdf [file 7600211s1.pdf]

# Fernandez et al. Supplementary Material

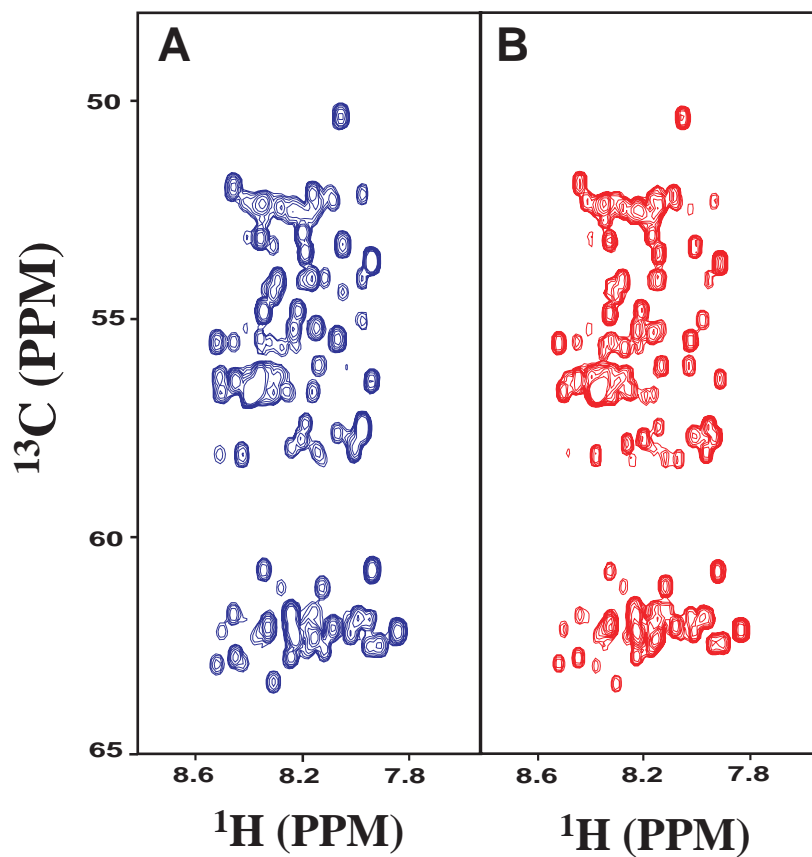

Supplementary Figure  
Fig. S1 Fernández et al.

**Fig. S1.** Proton-carbon correlation (HNCA) spectra at 15 °C of (A)  $\alpha$ -synuclein in the presence of 3 mM spermine, and (B) free  $\alpha$ -synuclein. The absence of any systematic changes in the  $\text{C}^\alpha$  chemical shifts upon polyamine binding supports the conclusion that polyamines do not induce the formation of substantial secondary structure elements under the given experimental conditions.
